# Supplementary material for: Malicious Mites—Sarcoptes scabiei in Raccoon Dogs (Nyctereutes procyonoides) in Schleswig-Holstein, Germany
Source: MDPI journal article supplement (doi:10.3390/pathogens12121379), 2023-11-22
Supplement: s1 [file s1]

## Supplements

**Table S1:** Detected bacterial and fungal microorganisms in raccoon dogs presented with sarcoptic mange

| Animal              | Microorganism<br>Organ | No growth | <i>Acinetobacter</i> spp. | aerobic bacilli | $\alpha$ -streptococci | <i>C. perfringens</i> <sup>1</sup> | <i>Coryne. auriscanis</i> <sup>2</sup> | <i>Enterobacter</i> spp. | <i>Enteroc. faecalis</i> <sup>3</sup> | <i>Escherichia coli</i> | <i>Fungi</i> <sup>4</sup> | <i>Lactococcus</i> spp. | <i>Macrococcus</i> spp. | other <i>Enterobacteriales</i> <sup>5</sup> | <i>Pseudomonas</i> spp. | <i>Psychrobacter</i> spp. | <i>S. pseudintermedius</i> <sup>6</sup> | Coag.-neg. staph. <sup>7</sup> | <i>Strep. canis</i> <sup>8</sup> | <i>Strep. dysgalactiae</i> | <i>Vagococcus</i> spp. |
|---------------------|------------------------|-----------|---------------------------|-----------------|------------------------|------------------------------------|----------------------------------------|--------------------------|---------------------------------------|-------------------------|---------------------------|-------------------------|-------------------------|---------------------------------------------|-------------------------|---------------------------|-----------------------------------------|--------------------------------|----------------------------------|----------------------------|------------------------|
| Raccoon dog 1 (Np1) | Liver                  |           |                           | (+)             | +                      |                                    |                                        | +                        |                                       |                         |                           | +                       |                         | +                                           |                         |                           | +                                       | +                              |                                  |                            |                        |
|                     | Spleen                 |           |                           |                 |                        |                                    |                                        |                          |                                       |                         |                           | (+)                     |                         |                                             |                         |                           | +                                       | +                              |                                  |                            |                        |
|                     | Kidney                 |           |                           |                 | +                      |                                    |                                        |                          |                                       |                         |                           |                         |                         | (+)                                         |                         |                           | ++                                      | +                              |                                  |                            |                        |
|                     | Lung                   |           | +                         |                 | +                      |                                    |                                        |                          | +                                     |                         |                           | +                       |                         | +                                           |                         |                           | +++                                     | +                              | +                                |                            |                        |
|                     | Small Intestine        |           |                           | +               | ++                     | +++                                |                                        |                          |                                       |                         |                           | +                       |                         | (+)                                         |                         |                           | ++                                      |                                |                                  |                            |                        |
|                     | Large Intestine        |           |                           | ++              | ++                     | +++                                |                                        |                          |                                       |                         |                           | +                       |                         |                                             |                         |                           | +                                       |                                |                                  |                            |                        |
|                     | Brain                  |           |                           |                 | (+)                    |                                    |                                        |                          |                                       |                         |                           | (+)                     |                         | (+)                                         |                         |                           | +                                       | +                              |                                  |                            |                        |
|                     | Reproductive Organs    | +         |                           |                 |                        |                                    |                                        |                          |                                       |                         |                           |                         |                         |                                             |                         |                           |                                         |                                |                                  |                            |                        |
|                     | Skin                   |           |                           |                 |                        |                                    |                                        |                          |                                       |                         |                           |                         |                         | +                                           |                         | +                         | +++                                     |                                |                                  |                            |                        |
| Raccoon dog 2 (Np2) | Liver                  |           |                           |                 |                        |                                    |                                        |                          |                                       |                         |                           |                         | +                       |                                             |                         |                           | (+)                                     |                                |                                  |                            |                        |
|                     | Spleen                 |           |                           |                 |                        |                                    |                                        |                          |                                       |                         |                           |                         |                         |                                             |                         |                           |                                         |                                |                                  |                            |                        |
|                     | Kidney                 |           |                           |                 | +                      |                                    | +                                      |                          |                                       |                         |                           |                         | +                       | (+)                                         |                         |                           | +                                       | ++                             |                                  | +                          |                        |
|                     | Lung                   |           |                           |                 | +                      |                                    | +                                      |                          |                                       |                         |                           |                         | +                       |                                             |                         |                           | +                                       | +                              |                                  |                            |                        |
|                     | Small Intestine        |           |                           |                 | +                      |                                    | +                                      |                          |                                       |                         |                           |                         | +                       |                                             |                         |                           | (+)                                     | +                              |                                  |                            |                        |
|                     | Large Intestine        |           |                           |                 | +                      |                                    | +                                      |                          |                                       | +                       |                           |                         | +                       |                                             |                         |                           | (+)                                     | +                              |                                  |                            |                        |
|                     | Mesenteric lymph node  |           |                           |                 |                        |                                    | +                                      |                          |                                       |                         |                           |                         | +                       |                                             |                         |                           | (+)                                     | +                              |                                  |                            |                        |
|                     | Brain                  |           |                           |                 | +                      |                                    | ++                                     |                          |                                       |                         |                           |                         | ++                      |                                             |                         |                           | +                                       | ++                             |                                  | +                          |                        |
|                     | Reproductive Organs    |           |                           |                 | +                      |                                    | +                                      |                          |                                       |                         |                           |                         | +                       |                                             |                         |                           | +                                       | ++                             |                                  |                            |                        |
|                     | Skin                   |           |                           |                 |                        |                                    | +++                                    |                          |                                       |                         |                           |                         | +                       |                                             |                         |                           | +++                                     | +++                            |                                  |                            |                        |

(continued)

| Animal              | Microorganism<br><br>Organ |           |                           |                 |                        |                                    |                                        |                          |                                       |                         |                           |                         |                         |                                             |                         |                           |                                         |                                |                                  |                            |                        |
|---------------------|----------------------------|-----------|---------------------------|-----------------|------------------------|------------------------------------|----------------------------------------|--------------------------|---------------------------------------|-------------------------|---------------------------|-------------------------|-------------------------|---------------------------------------------|-------------------------|---------------------------|-----------------------------------------|--------------------------------|----------------------------------|----------------------------|------------------------|
|                     |                            | No growth | <i>Acinetobacter</i> spp. | aerobic bacilli | $\alpha$ -streptococci | <i>C. perfringens</i> <sup>1</sup> | <i>Coryne. auriscanis</i> <sup>2</sup> | <i>Enterobacter</i> spp. | <i>Enteroc. faecalis</i> <sup>3</sup> | <i>Escherichia coli</i> | <i>Fungi</i> <sup>4</sup> | <i>Lactococcus</i> spp. | <i>Macrococcus</i> spp. | other <i>Enterobacteriales</i> <sup>5</sup> | <i>Pseudomonas</i> spp. | <i>Psychrobacter</i> spp. | <i>S. pseudintermedius</i> <sup>6</sup> | Coag.-neg. staph. <sup>7</sup> | <i>Strep. canis</i> <sup>8</sup> | <i>Strep. dysgalactiae</i> | <i>Vagococcus</i> spp. |
| Raccoon dog 3 (Np3) | Liver                      |           |                           |                 |                        |                                    |                                        |                          |                                       |                         |                           |                         |                         | (+)                                         |                         | +                         |                                         |                                | +                                |                            |                        |
|                     | Spleen                     |           |                           |                 | +                      |                                    |                                        |                          |                                       |                         |                           |                         |                         |                                             |                         | +                         | (+)                                     | (+)                            |                                  |                            |                        |
|                     | Kidney                     |           |                           |                 |                        |                                    |                                        |                          |                                       |                         |                           |                         |                         | (+)                                         | +                       | +                         | +                                       | +                              | ++                               |                            |                        |
|                     | Lung                       |           |                           | +               | +                      |                                    |                                        |                          |                                       |                         |                           |                         |                         | +                                           | +                       | ++                        | +                                       | ++                             | ++                               |                            |                        |
|                     | Small Intestine            |           |                           | +               | +                      | +                                  |                                        |                          |                                       |                         |                           |                         |                         |                                             |                         |                           | +                                       | +                              | +                                |                            |                        |
|                     | Large Intestine            |           |                           | +               | +                      | +++                                |                                        |                          |                                       |                         |                           |                         |                         |                                             | +                       |                           | +                                       | +                              | +                                |                            |                        |
|                     | Mesenteric lymph node      |           |                           |                 | +                      |                                    |                                        |                          |                                       |                         |                           |                         |                         |                                             |                         |                           | +                                       | +                              | +++                              |                            |                        |
|                     | Brain                      |           |                           |                 | +++                    |                                    |                                        |                          |                                       |                         |                           |                         |                         | +                                           | +                       |                           | ++                                      | ++                             | +                                |                            |                        |
|                     | Reproductive Organs        |           |                           |                 | +                      |                                    |                                        |                          |                                       |                         |                           |                         |                         | +                                           | +                       |                           |                                         | +                              | +                                |                            |                        |
|                     | Skin                       |           |                           | +               | ++                     |                                    | +++                                    |                          |                                       |                         |                           |                         |                         |                                             |                         |                           |                                         | ++                             | ++                               |                            |                        |
| Raccoon dg 4 (Np4)  | Liver                      |           |                           |                 |                        |                                    |                                        |                          |                                       |                         |                           |                         |                         |                                             |                         |                           | +                                       |                                |                                  |                            |                        |
|                     | Spleen                     |           |                           |                 |                        |                                    |                                        |                          |                                       |                         |                           |                         |                         |                                             |                         |                           | +                                       |                                |                                  |                            |                        |
|                     | Kidney                     |           |                           |                 |                        |                                    |                                        |                          |                                       |                         |                           |                         |                         |                                             |                         |                           | +                                       |                                |                                  |                            |                        |
|                     | Lung                       |           |                           |                 |                        |                                    |                                        |                          |                                       |                         |                           |                         |                         |                                             |                         |                           |                                         |                                |                                  |                            |                        |
|                     | Small Intestine            |           |                           | +               |                        |                                    |                                        | ++                       |                                       |                         |                           |                         |                         |                                             |                         |                           | +                                       |                                |                                  |                            |                        |
|                     | Large Intestine            |           |                           | ++              |                        |                                    |                                        | ++                       |                                       |                         |                           |                         |                         |                                             |                         |                           | ++                                      |                                |                                  |                            |                        |
|                     | Mesenteric lymph node      |           |                           |                 |                        |                                    |                                        |                          |                                       |                         |                           |                         |                         |                                             |                         |                           | (+)                                     |                                |                                  |                            |                        |
|                     | Skin                       |           |                           |                 |                        |                                    |                                        |                          |                                       |                         |                           |                         |                         | (+)                                         |                         |                           | +++                                     |                                |                                  |                            |                        |

(continued)

| Animal              | Microorganism<br><br>Organ |           |                           |                 |                        |                                    |                                        |                          |                                       |                         |                           |                            |                           |                         |                                             |                         |                           |                                         |                                |                                  |                            |                        |
|---------------------|----------------------------|-----------|---------------------------|-----------------|------------------------|------------------------------------|----------------------------------------|--------------------------|---------------------------------------|-------------------------|---------------------------|----------------------------|---------------------------|-------------------------|---------------------------------------------|-------------------------|---------------------------|-----------------------------------------|--------------------------------|----------------------------------|----------------------------|------------------------|
|                     |                            | No growth | <i>Acinetobacter</i> spp. | aerobic bacilli | $\alpha$ -streptococci | <i>C. perfringens</i> <sup>1</sup> | <i>Coryne. auriscanis</i> <sup>2</sup> | <i>Enterobacter</i> spp. | <i>Enteroc. faecalis</i> <sup>3</sup> | <i>Escherichia coli</i> | <i>Fungi</i> <sup>4</sup> | <i>Lactococcus garviae</i> | <i>Lactococcus lactis</i> | <i>Macrococcus</i> spp. | other <i>Enterobacteriales</i> <sup>5</sup> | <i>Pseudomonas</i> spp. | <i>Psychrobacter</i> spp. | <i>S. pseudintermedius</i> <sup>6</sup> | Coag.-neg. staph. <sup>7</sup> | <i>Strep. canis</i> <sup>8</sup> | <i>Strep. dysgalactiae</i> | <i>Vagococcus</i> spp. |
| Raccoon dog 5 (Np5) | Liver                      | +         |                           |                 |                        |                                    |                                        |                          |                                       |                         |                           |                            |                           |                         |                                             |                         |                           |                                         |                                |                                  |                            |                        |
|                     | Spleen                     |           |                           |                 |                        |                                    |                                        |                          |                                       |                         |                           |                            | (+)                       |                         |                                             |                         |                           | (+)                                     |                                |                                  |                            |                        |
|                     | Kidney                     |           |                           |                 |                        |                                    | +                                      |                          |                                       |                         |                           |                            | (+)                       |                         |                                             |                         |                           | +                                       | (+)                            | (+)                              |                            |                        |
|                     | Lung                       |           |                           |                 |                        |                                    | +                                      |                          |                                       |                         |                           |                            | +                         | (+)                     | (+)                                         |                         |                           | +                                       | (+)                            |                                  |                            |                        |
|                     | Small Intestine            |           |                           |                 |                        | +                                  |                                        |                          |                                       | +                       |                           |                            | +                         |                         |                                             |                         |                           | +                                       | (+)                            | (+)                              |                            |                        |
|                     | Large Intestine            |           |                           | +               |                        | +++                                |                                        |                          |                                       | (+)                     | +                         |                            | +                         |                         |                                             |                         |                           | +                                       | +                              | (+)                              |                            |                        |
|                     | Mesenteric lymph node      |           |                           |                 |                        |                                    | (+)                                    |                          |                                       |                         |                           |                            |                           |                         |                                             |                         |                           | (+)                                     |                                |                                  |                            |                        |
|                     | Inguinal lymph node        |           |                           |                 |                        |                                    |                                        |                          |                                       |                         |                           |                            |                           |                         |                                             |                         |                           | ++                                      | (+)                            | (+)                              |                            |                        |
|                     | Brain                      |           |                           |                 |                        |                                    | +                                      |                          |                                       |                         |                           |                            |                           |                         |                                             |                         |                           | (+)                                     | (+)                            |                                  |                            |                        |
|                     | Reproductive Organs        |           |                           |                 |                        |                                    |                                        |                          |                                       |                         |                           |                            |                           |                         |                                             |                         |                           | (+)                                     |                                |                                  |                            |                        |
|                     | Skin                       |           |                           |                 |                        |                                    | ++                                     |                          |                                       |                         |                           |                            |                           | ++                      |                                             |                         |                           | +++                                     | +                              |                                  |                            |                        |

<sup>1</sup>*C. perfringens*, *Clostridium perfringens*; <sup>2</sup>*Coryne. auriscanis*, *Corynebacterium auriscanis*; <sup>3</sup>*Enteroc. faecalis*, *Enterococcus faecalis*; <sup>4</sup>Fungi, not further identified; <sup>5</sup>include *Buttiauxella* spp., *Leclercia* spp., *Pantoea* spp., *Rahnella* spp., *Raoultella* spp., *Serratia* spp.; <sup>6</sup>*S. pseudintermedius*, *Staphylococcus pseudintermedius*; <sup>7</sup>Coag.-neg. staph., coagulase negative staphylococci;

<sup>8</sup>*Strep. canis*, *Streptococcus canis*

**Table S2:** Biological data and pathological findings of the five investigated raccoon dogs presented with sarcoptic mange

| Biological data     |     |          |                    | Pathological findings                                                                                                                                                                                                                        |                                                                                                                                                                                                                                                                                                                                                                                                                                                                                                                                                                                                                                                                                                                                                   |
|---------------------|-----|----------|--------------------|----------------------------------------------------------------------------------------------------------------------------------------------------------------------------------------------------------------------------------------------|---------------------------------------------------------------------------------------------------------------------------------------------------------------------------------------------------------------------------------------------------------------------------------------------------------------------------------------------------------------------------------------------------------------------------------------------------------------------------------------------------------------------------------------------------------------------------------------------------------------------------------------------------------------------------------------------------------------------------------------------------|
| Animal              | Sex | Age      | Nutritional status | Gross                                                                                                                                                                                                                                        | Histopathology                                                                                                                                                                                                                                                                                                                                                                                                                                                                                                                                                                                                                                                                                                                                    |
| Raccoon dog 1 (Np1) | M   | juvenile | Not assessable     | <b>Skin:</b> Alopecia with severe lichenification, crust formation and hyperpigmentation of the skin; Ectoparasitosis, mild (ticks and louse flies)                                                                                          | <b>Skin:</b> Epidermal hyperplasia and hyperkeratosis, diffuse, severe, with mild eosinophilic dermatitis and numerous intracorneal mites; <b>Tonsils:</b> Follicular hyperplasia, mild; <b>Retropharyngeal lymph node:</b> Follicular hyperplasia, severe; <b>Lung:</b> Bronchopneumonia, necrosuppurative, multifocal,, acute, mild; <b>Pulmonary lymph node:</b> Follicular hyperplasia, severe; <b>Liver:</b> Hepatolipidosis, diffuse, mild; <b>Spleen:</b> Follicular hyperplasia, mild; <b>Intestine:</b> Enteritis, lymphocytic, multisegmental, chronic, mild; <b>Mesenteric lymph node:</b> Follicular hyperplasia, severe; <b>Peyer's patches :</b> Follicular hyperplasia; <b>Inguinal lymph node:</b> follicular hyperplasia, severe |
| Raccoon dog 2 (Np2) | F   | adult    | Good               | <b>Skin:</b> Alopecia with severe lichenification, crust formation and hyperpigmentation of the skin; Ectoparasitosis, mild (ticks)<br><br><b>Intestine:</b> Endoparasitosis, mild (nematodes); Catarrhal enteritis, segmental, acute, mild. | <b>Skin:</b> Epidermal hyperplasia and hyperkeratosis, diffuse, mild, with mild eosinophilic dermatitis and single intracorneal mites; <b>Nasal mucosa:</b> Rhinitis, suppurative and necrotizing, focal, subacute, mild, with intralesional foreign material; <b>Retropharyngeal lymph node:</b> Follicular hyperplasia, mild; <b>Lung:</b> Pneumonia, bronchointerstitial, lymphohistiocytic, diffuse, chronic, mild, with multifocal involvement of eosinophil granulocytes; airway smooth muscle hypertrophy, diffuse, moderate; <b>Mesenteric lymph node:</b> Follicular hyperplasia, severe; <b>Peyer's patches:</b> Follicular hyperplasia, severe                                                                                         |
| Raccoon dog 3 (Np3) | M   | juvenile | Poor               | <b>Skin:</b> Alopecia with severe lichenification, crust formation and hyperpigmentation of the skin; Ectoparasitosis, severe (ticks); <b>Intestine:</b> Endoparasitosis, moderate (nematodes); Catarrhal enteritis, segmental, mild         | <b>Skin:</b> Epidermal hyperplasia and hyperkeratosis, diffuse, severe, with mild eosinophilic dermatitis and numerous intracorneal mites; <b>Lung:</b> Bronchopneumonia, suppurative, multifocal, subacute, mild; Airway smooth muscle hypertrophy, diffuse, moderate; <b>Intestine:</b> few intraluminal nematodes, <b>Peyer's patches plates:</b> Follicular hyperplasia, mild                                                                                                                                                                                                                                                                                                                                                                 |

(continued)

| Biological data     |     |          |                    | Pathological findings                                                                                                                                                                                                                                                                                                                                       |                                                                                                                                                                                                                                                                                                                                                                                                                                                                                                                                                                                                                                                                                                                                                                                                                                                                                                                                                               |
|---------------------|-----|----------|--------------------|-------------------------------------------------------------------------------------------------------------------------------------------------------------------------------------------------------------------------------------------------------------------------------------------------------------------------------------------------------------|---------------------------------------------------------------------------------------------------------------------------------------------------------------------------------------------------------------------------------------------------------------------------------------------------------------------------------------------------------------------------------------------------------------------------------------------------------------------------------------------------------------------------------------------------------------------------------------------------------------------------------------------------------------------------------------------------------------------------------------------------------------------------------------------------------------------------------------------------------------------------------------------------------------------------------------------------------------|
| Animal              | Sex | Age      | Nutritional status | Gross                                                                                                                                                                                                                                                                                                                                                       | Histopathology                                                                                                                                                                                                                                                                                                                                                                                                                                                                                                                                                                                                                                                                                                                                                                                                                                                                                                                                                |
| Raccoon dog 4 (Np4) | M   | juvenile | Not assessable     | <b>Skin:</b> Alopecia with severe lichenification, crust formation and hyperpigmentation of the skin; Ectoparasitosis, severe (ticks, louse flies; skin scraping during necropsy showed numerous mites (morphologically consistent with <i>Sarcoptes</i> spp.);<br><b>Intestine:</b> Endoparasitosis, mild (nematode); Catarrhal enteritis, segmental, mild | <b>Skin:</b> Epidermal hyperplasia and hyperkeratosis, diffuse, severe, with mild eosinophilic dermatitis and numerous intracorneal mites;<br><b>Retropharyngeal lymph node:</b> Follicular hyperplasia, severe; <b>Lung:</b> Bronchopneumonia, suppurative, multifocal, subacute, moderate;<br><b>Liver:</b> Hepatitis, necrotizing, (sub)acute, mild; <b>Spleen:</b> hyperplasia of the red and white pulp, moderate; <b>Peyer's patches:</b> Follicular hyperplasia, severe; <b>Bone marrow:</b> Trilinear hyperplasia                                                                                                                                                                                                                                                                                                                                                                                                                                     |
| Raccoon dog 5 (Np5) | M   | adult    | Poor               | <b>Skin:</b> multifocal thinning of the haircoat; Ectoparasitosis, mild (ticks); <b>Intestine:</b> Endoparasitosis, mild (cestodes)                                                                                                                                                                                                                         | <b>Skin:</b> Epidermal hyperplasia and hyperkeratosis, diffuse, severe, with mild eosinophilic dermatitis and numerous intracorneal mites;<br><b>Tonsils:</b> Follicular hyperplasia, moderate; <b>Retropharyngeal lymph node:</b> Follicular hyperplasia, mild;<br><b>Trachea:</b> Calcification of the cartilage, mild; <b>Lung:</b> Pneumonia, bronchointerstitial, lymphoplasmacytic and eosinophilic, diffuse, chronic, mild, ;<br><b>Liver:</b> Hepatitis, necrotizing, multifocal, acute, moderate;<br><b>Stomach:</b> Follicular gastritis, multifocal, chronic, moderate;<br><b>Spleen:</b> hyperplasia of the red and white pulp, mild; <b>Intestine:</b> Enteritis, mostly eosinophilic, segmental, acute, mild; <b>Kidney:</b> Fibrosis, interstitial, focal, chronic, severe; <b>Aortic lymph node:</b> Follicular hyperplasia, severe;<br><b>Inguinal lymph node:</b> Follicular hyperplasia, severe; <b>Bone marrow:</b> Trilinear hyperplasia |
